# Supplementary material for: Three-Dimensional SnS Decorated Carbon Nano-Networks as Anode Materials for Lithium and Sodium Ion Batteries
Source: MDPI journal article supplement (doi:10.3390/nano8030135), 2018-02-28
Supplement: s1 [file s1]

## Supplementary materials

# Three-Dimensional SnS Decorated Carbon Nano-Networks as Anode Materials for Lithium and Sodium Ion Batteries

Yanli Zhou, Qi Wang, Xiaotao Zhu and Fuyi Jiang \*

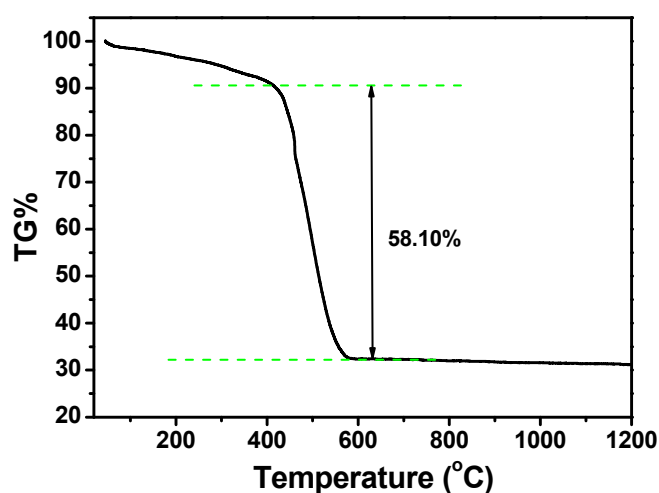

Figure S1. TG analysis of SnS@C composites.

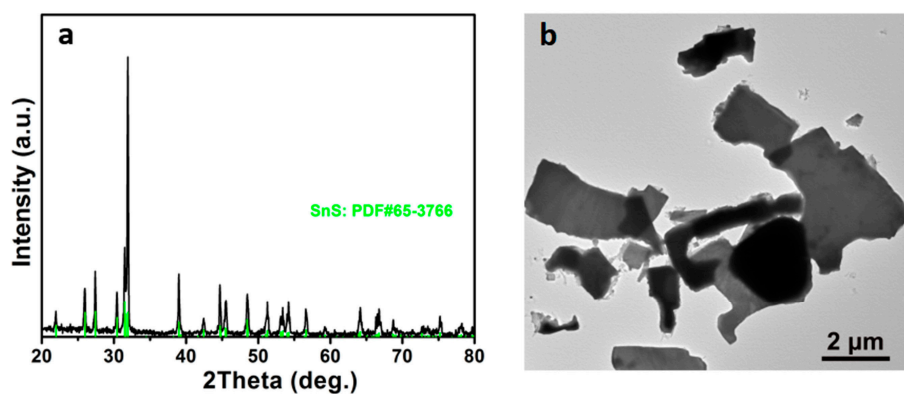

Figure S2. (a) XRD pattern and (b) TEM image of SnS nanoplates.
